# Supplementary material for: Cation ordering in A-site-deficient Li-ion conducting perovskites La(1−x)/3LixNbO3
Source: Royal Society of Chemistry journal article supplement (doi:10.1039/c4ta07040b), 2015-01-01
Supplement: c4ta07040b1.pdf [file c4ta07040b1.pdf]

## Electronic Supplementary Information for

### Cation ordering in A-site-deficient Li-ion conducting perovskites $\text{La}_{(1-x)/3}\text{Li}_x\text{NbO}_3$

Xiang Gao, Craig A. J. Fisher, Yumi H. Ikuhara, Yasuyuki Fujiwara, Shunsuke Kobayashi, Hiroki Moriwake, Akihito Kuwabara, Keigo Hoshikawa, Keiichi Kohama, Hideki Iba, and Yuichi Ikuhara

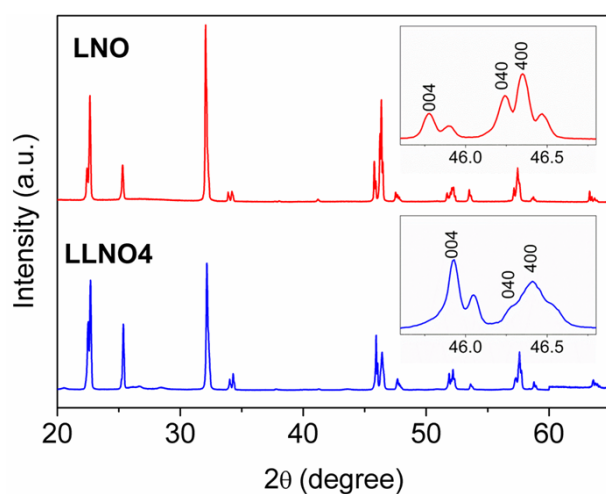

**Fig. S1** Powder XRD patterns obtained from single-crystalline LNO and LLNO4 samples. Splitting of the (200) peaks shown in the insets indicates an orthorhombic crystal symmetry (space group  $Cmmm$ ) for both compounds. Calculation revealed their lattice parameters of LNO ( $a = 7.8129 \text{ \AA}$ ,  $b = 7.8437 \text{ \AA}$ ,  $c = 7.9364 \text{ \AA}$ ) and LLNO4 ( $a = 7.7888 \text{ \AA}$ ,  $b = 7.8252 \text{ \AA}$ ,  $c = 7.9164 \text{ \AA}$ ).

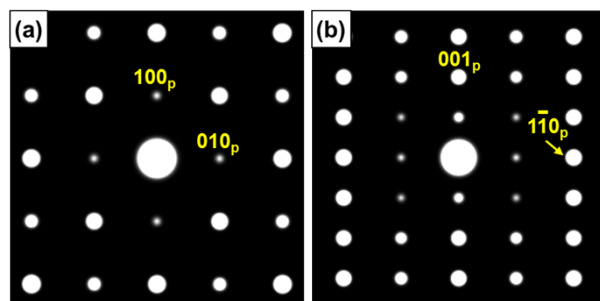

**Fig. S2** Simulated (a)  $[001]_p$  and (b)  $[110]_p$  SAED patterns from the average crystal structure model of  $\text{La}_{0.32}\text{Li}_{0.06}\text{NbO}_3$  ( $x = 0.06$ )<sup>6</sup> which has the same crystal symmetry (orthorhombic) and a similar Li content compared to LLNO4 ( $x = 0.04$ ).

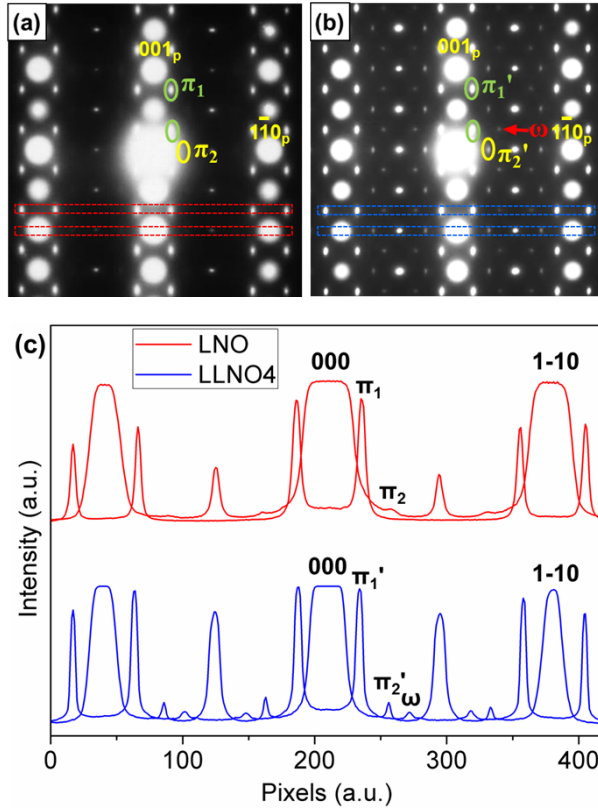

**Fig. S3** SAED patterns taken from (a) LNO and (b) LLNO4 along their  $[110]_p$  zone axes. (c) Intensity-scan profiles taken from the marked regions in (a) and (b) to reveal the positions of weak reflections, i.e. ( $\pi_1$ ,  $\pi_2$ ) of LNO and ( $\pi_1'$ ,  $\pi_2'$  and  $\omega$ ) of LLNO4, along the  $[1-10]_p$  direction.

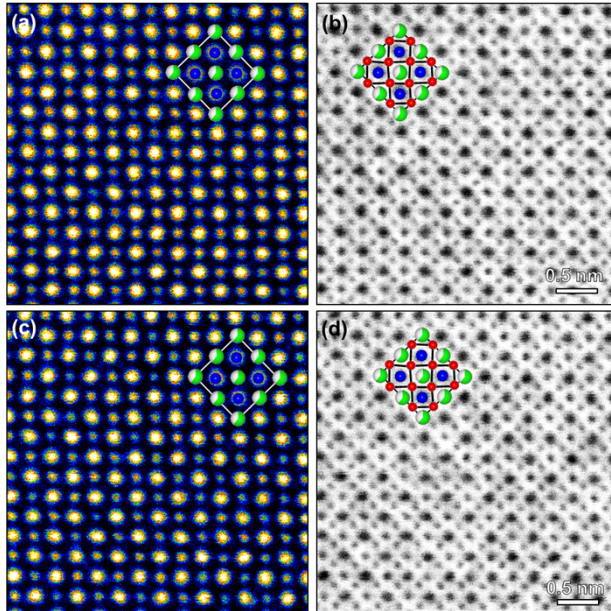

**Fig. S4**  $[001]_p$  zone-axis HAADF/ABF imaging. (a) HAADF and (b) ABF micrographs of LNO. (c) HAADF and (d) ABF micrographs of LLNO4. Overlaid structure models indicate the positions of O (red), Nb+O (blue) and La+vacancy (green) columns.
